# Supplementary material for: Non-monotonic Response to Monotonic Stimulus: Regulation of Glyoxylate Shunt Gene-Expression Dynamics in Mycobacterium tuberculosis
Source: PubMed Central journal article supplement (PMC4762938; doi:10.1371/journal.pcbi.1004741), 2016-02-22

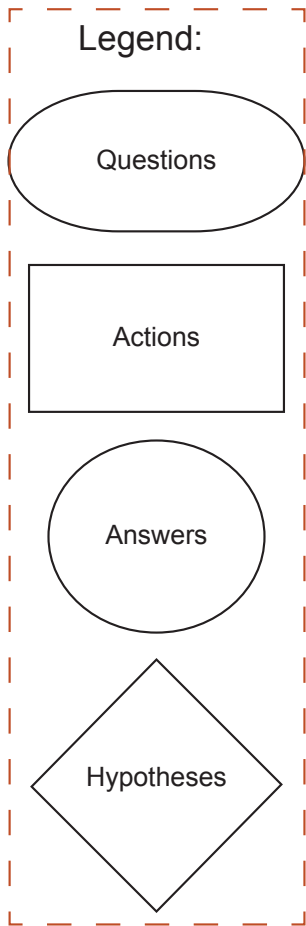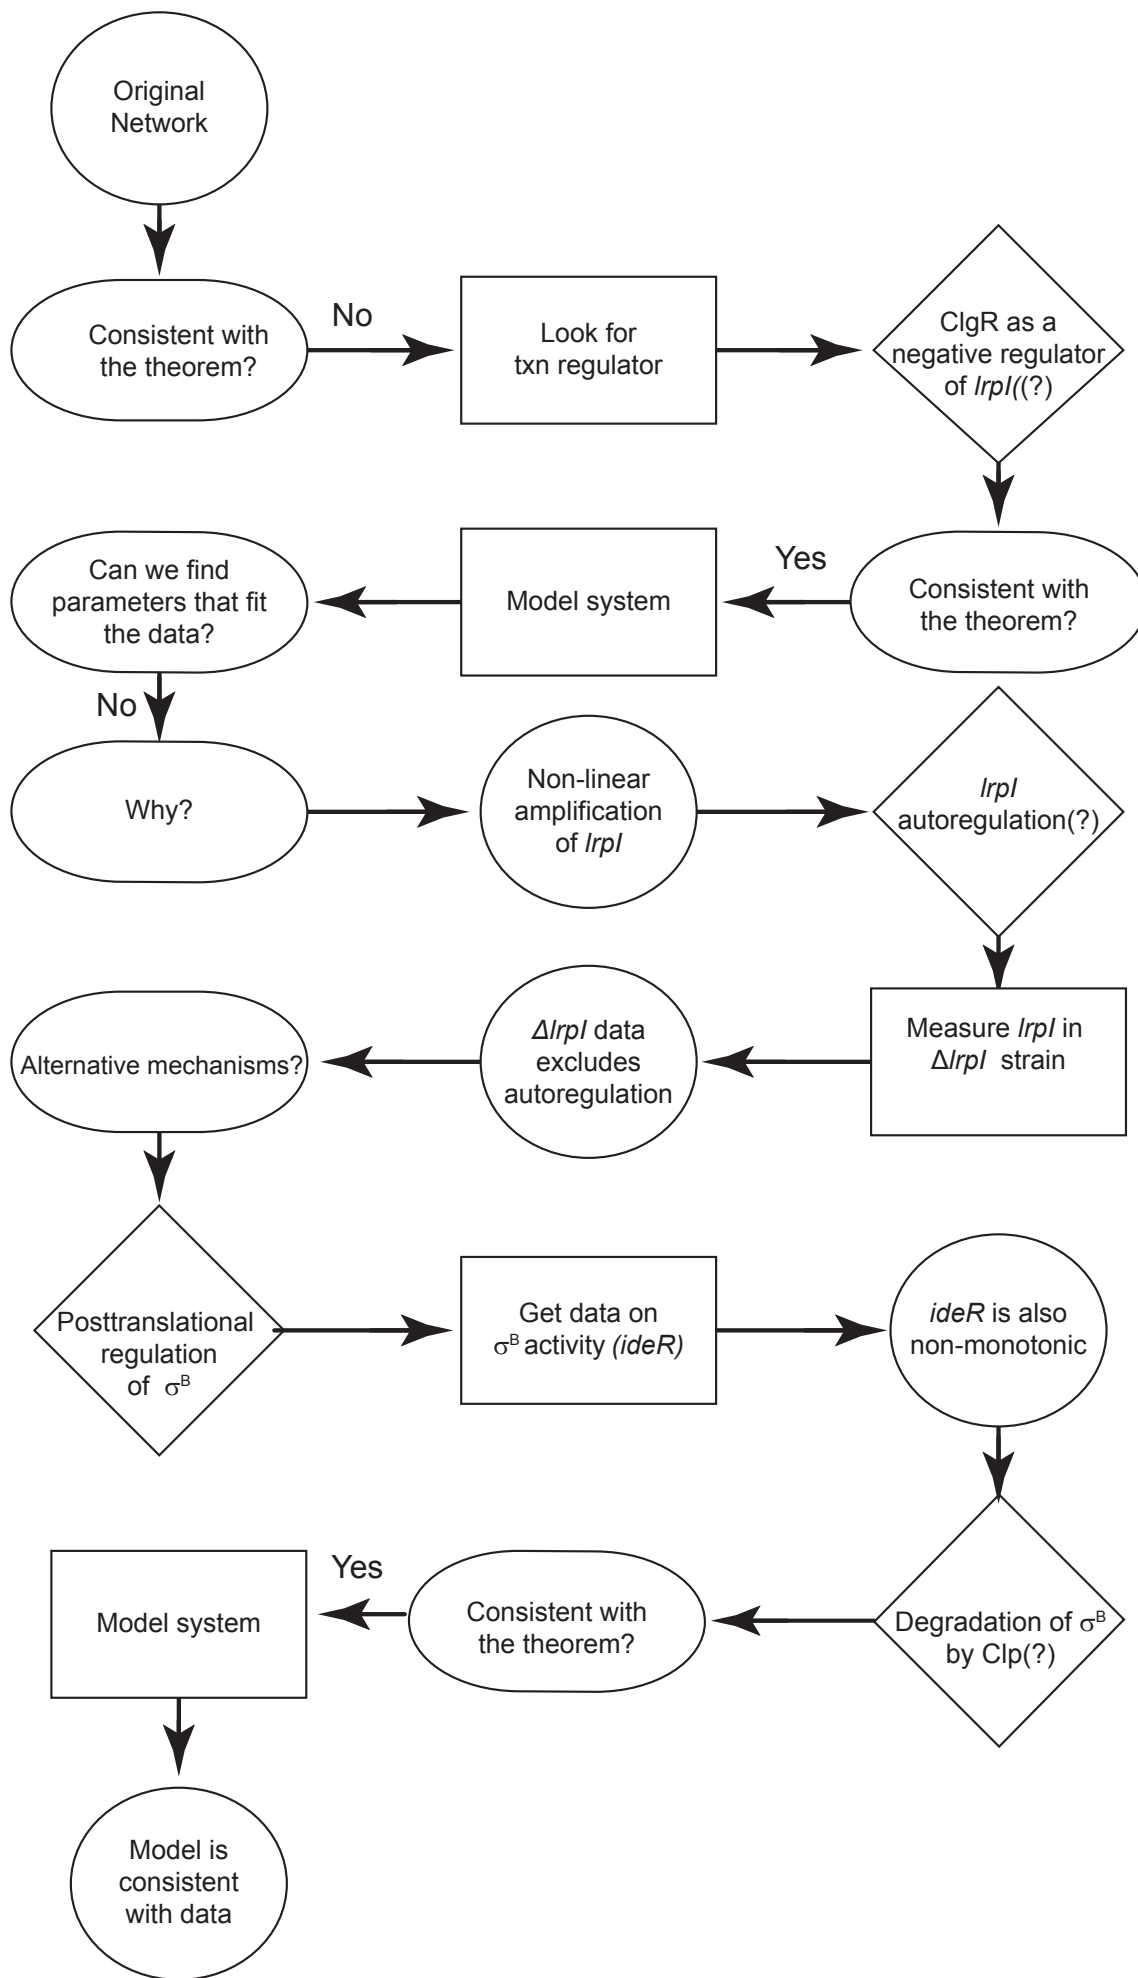

Supplement: pcbi.1004741.s001.pdf [file pcbi.1004741.s001.pdf]
