# Supplementary material for: Non-monotonic Response to Monotonic Stimulus: Regulation of Glyoxylate Shunt Gene-Expression Dynamics in Mycobacterium tuberculosis
Source: PubMed Central journal article supplement (PMC4762938; doi:10.1371/journal.pcbi.1004741), 2016-02-22
Supplement: pcbi.1004741.s007.pdf [file pcbi.1004741.s007.pdf]

**Table S1: Input interpolation parameter values**

|   | $a_n$ | $b_n$ | $c_n$ |
|---|-------|-------|-------|
| 1 | 2.137 | 2.399 | 2.598 |
| 2 | 3.296 | 2.764 | 4.732 |
| 3 | 4.434 | 4.095 | 4.631 |
| 4 | --    | --    | 0.603 |
