# Supplementary material for: Non-monotonic Response to Monotonic Stimulus: Regulation of Glyoxylate Shunt Gene-Expression Dynamics in Mycobacterium tuberculosis
Source: PubMed Central journal article supplement (PMC4762938; doi:10.1371/journal.pcbi.1004741), 2016-02-22
Supplement: pcbi.1004741.s008.pdf [file pcbi.1004741.s008.pdf]

| <b>Table S2: Description of Parameters</b> |                                                            |
|--------------------------------------------|------------------------------------------------------------|
| <b>Parameter</b>                           | <b>Description</b>                                         |
| $\beta$                                    | Ratio of basal transcription rate to mRNA degradation rate |
| $b$                                        | Protein translation rate                                   |
| $n$                                        | Kinetic order                                              |
| $f$                                        | Amplification gain                                         |
| $k_{deg}$                                  | Protein degradation rate                                   |
| $K$                                        | Equilibrium dissociation constant                          |
| $k_f$                                      | Rate of forward binding reaction                           |
| $k_r$                                      | Rate of reverse binding reaction                           |
| $k_{cat}$                                  | Rate of catalytic step in degradation reaction             |
| $K_M$                                      | Michaelis-menten constant                                  |
