# Supplementary material for: Non-monotonic Response to Monotonic Stimulus: Regulation of Glyoxylate Shunt Gene-Expression Dynamics in Mycobacterium tuberculosis
Source: PubMed Central journal article supplement (PMC4762938; doi:10.1371/journal.pcbi.1004741), 2016-02-22
Supplement: pcbi.1004741.s009.pdf [file pcbi.1004741.s009.pdf]

| <b>Table S3: Parameter Ranges</b> |                    |                    |
|-----------------------------------|--------------------|--------------------|
| <b>Parameter</b>                  | <b>Lower Limit</b> | <b>Upper Limit</b> |
| <i>f</i>                          | 1                  | 100                |
| <i>n</i>                          | 0.1                | 10                 |
| <i>K</i>                          | 1                  | 1000               |
| <i>All other parameters</i>       | 0.001              | 1000               |
