# Supplementary material for: Non-monotonic Response to Monotonic Stimulus: Regulation of Glyoxylate Shunt Gene-Expression Dynamics in Mycobacterium tuberculosis
Source: PubMed Central journal article supplement (PMC4762938; doi:10.1371/journal.pcbi.1004741), 2016-02-22
Supplement: pcbi.1004741.s010.pdf [file pcbi.1004741.s010.pdf]

**Table S4: Optimized Parameter Values Corresponding to Fig. 6**

| <b>Parameter Name</b> | <b>Parameter Value</b> |
|-----------------------|------------------------|
| $f_{LB}$              | 2.85                   |
| $f_{RB}$              | 2.67                   |
| $f_{ILB}$             | 9.38                   |
| $f_{CC}$              | 53.0                   |
| $K_{LB}$              | 4.25                   |
| $K_{ILB}$             | 18.1                   |
| $K_{RB}$              | 3.69                   |
| $K_{CC}$              | 547                    |
| $n_I$                 | 5.98                   |
| $n_{CC}$              | 3.75                   |
| $\beta_{LrpI}$        | 0.057                  |
| $\beta_{IclI}$        | 2.60                   |
| $\beta_{Clp}$         | 619                    |
| $\beta_{IdeR}$        | 0.0051                 |
| $b_{Clp}$             | 7.46                   |
| $b_B$                 | 986                    |
| $b_{ClgR}$            | 3.12                   |
| $b_{LrpI}$            | 0.36                   |
| $k_{degB}$            | 9.05                   |
| $k_{degClgR}$         | 1.65                   |
| $k_{degLrpI}$         | 0.0015                 |
| $k_{degClp}$          | 0.11                   |
| $k_{cat}$             | 0.015                  |
| $K_M$                 | 0.10                   |
