# Supplementary material for: Non-monotonic Response to Monotonic Stimulus: Regulation of Glyoxylate Shunt Gene-Expression Dynamics in Mycobacterium tuberculosis
Source: PubMed Central journal article supplement (PMC4762938; doi:10.1371/journal.pcbi.1004741), 2016-02-22
Supplement: pcbi.1004741.s011.pdf [file pcbi.1004741.s011.pdf]

**Table S5: Primers (Fwd and Rev) and molecular beacons (MB)**

|                 |                                                                                                         |
|-----------------|---------------------------------------------------------------------------------------------------------|
| <i>icl1</i>     | Fwd: GGCCTCTTCGGTGGAAAC<br>Rev: CCAGAACCAGATGAGCGCGTAT<br>MB: ACGCCCGGGGCTACACCGCGACCAA GGGCGT          |
| <i>lrpI</i>     | Fwd: GTTCTTTGCCTCCCAGGACGACA<br>Rev: GCCACTTCATGCGGGTTCGATG<br>MB: CGCACGTTGCCGAACCTCAGGGAGGTGACCGTGCG  |
| <i>sigE</i>     | Fwd: ACGACTTGCCAACTTATTGCAG<br>Rev: GGATGAGACATGCTGGTTCGGAC<br>MB: CGCACGATATCACGACCATCACGACC TTGCGTGCG |
| <i>sigB</i>     | Fwd: ACAAGCCGGGTTGACAGCGATCT<br>Rev: TGCGCTTGCCAGTTCGACTTC<br>MB: CGCACGCTCAAAGCCCCGCGGCGGACGTGCG       |
| <i>clgR</i>     | Fwd: TGAGCCTCGGGTATCTGTCCG<br>Rev: AAGGCGCTCTTGACGCGCCAT<br>MB: ACGGGGCGAGCTGCTCAGTGCGATTTGTACCCCGT     |
| <i>ideR</i>     | Fwd: AACGCACGAGTAACCGTCGAAAC<br>Rev: TCAGACTTTCTCGACCTTGACCGC<br>MB: CCCC GGCGGCGTGACCATCGTCATCCCCGGGG  |
| <i>16S rRNA</i> | Fwd: ATGACGGCCTTCGGGTTGTAA<br>Rev: CGGCTGCTGGCACGTAGTTT<br>MB: CCCC GCCGACGAAGGTCCGGGTTCTCGCGGGG        |
